# Supplementary material for: Analysis of synthetic route and case correlation of methamphetamine crystals seized by ultra-high-performance liquid chromatography-mass spectrometry (UPLC-MS/MS) and Pearson correlation coefficient method
Source: Royal Society of Chemistry journal article supplement (doi:10.1039/d4ay01519c), 2024-01-01
Supplement: d4ay01519c1.pdf [file d4ay01519c1.pdf]

**Analysis of synthetic route and case correlation of methamphetamine crystals  
seized by ultra-high-performance liquid chromatography-mass spectrometry  
(UPLC-MS/MS) and Pearson correlation coefficient method**

Shan Liu<sup>a,b,c,d</sup>, Yuemeng Chen<sup>a,b\*</sup>, Fang Wang<sup>c\*</sup>, Song Bai<sup>c\*</sup>, JingJie Wu<sup>b</sup>

<sup>a</sup>Guiyang Municipal Public Security Bureau, Guiyang, 550081, China;

<sup>b</sup>Guizhou Police College, Guiyang, 550000, China;

<sup>c</sup>Guizhou Industry Polytechnic College, Guiyang, 550008, China;

<sup>d</sup>State Key Laboratory Breeding Base of Green Pesticide and Agricultural  
Bioengineering, Key Laboratory of Green Pesticide and Agricultural Bioengineering,  
Ministry of Education, Guizhou University, Guiyang, 550025, China.

\*Corresponding Author: Yuemeng Chen, Fang Wang and Song Bai

Email address: cym13984091203@163.com; wf19970908@163.com;

basonmail@163.com

Tel.: (+86)851 86797762 (CYM); (+86)851 84705541 (WF and BS)

## Figure captions

Fig S1. Correlation discriminant diagram for samples with synthetic route E

## Table captions

Table S1. Acceptable maximum relative standard deviation of ratios of characteristic ions abundance

Table S2. The relative error in  $t_R$  for 22 target substances in the QC sample and samples from real cases to be tested

Table S3. The relative error in peak area ratio for 22 target substances in the QC sample and samples from real cases to be tested

## Figure

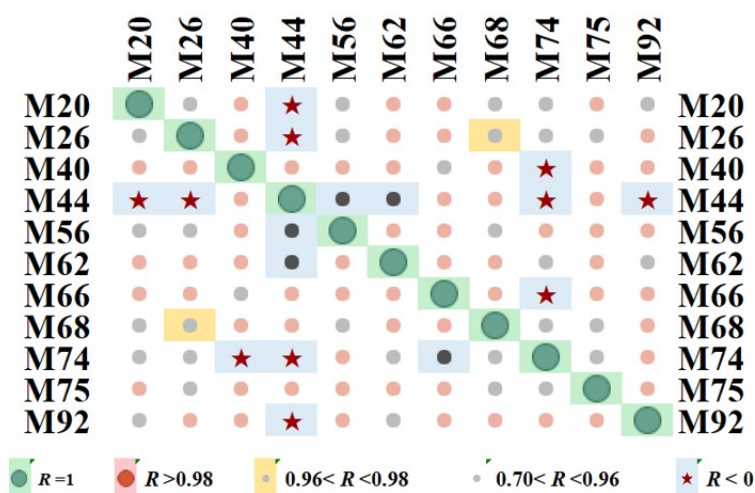

Fig S1. Correlation discriminant diagram for samples with synthetic route E

## Tables

Table S1. Acceptable maximum relative standard deviation of ratios of characteristic ions abundance

| Peak area ratio range | $\geq 50\%$ | 20%–50%    | 10%–20%,   | $\leq 10\%$ |
|-----------------------|-------------|------------|------------|-------------|
| Maximum tolerance     | $\pm 20\%$  | $\pm 25\%$ | $\pm 30\%$ | $\pm 50\%$  |

These discrimination factor refer to standard methods (JD/Y JY03.02-2017)<sup>14</sup> and (GA/T 2053-2023)

Table S2. The relative error in  $t_R$  for 22 target substances in the QC sample and samples from real cases to be tested

| Samp<br>les | IM<br>01 | IM<br>02 | IM<br>03 | IM<br>04 | IM<br>05 | IM<br>06 | IM<br>07 | IM<br>08 | IM<br>09 | IM<br>10 | IM<br>11 | IM<br>12 | IM<br>13 | IM<br>14 | IM<br>15 | IM<br>16 | IM<br>17 | IM<br>18 | IM<br>19 | IM<br>20 | IM<br>21 | IM<br>22 |
|-------------|----------|----------|----------|----------|----------|----------|----------|----------|----------|----------|----------|----------|----------|----------|----------|----------|----------|----------|----------|----------|----------|----------|
| M1          | -1.20    | -1.07    | -0.03    | -0.45    | —        | 0.11     | —        | -0.51    | -0.58    | -0.30    | -0.40    | —        | —        | —        | -0.03    | —        | —        | -0.08    | -0.22    | -0.06    | -0.06    | —        |
| M2          | -1.09    | -0.23    | -0.03    | -0.15    | —        | 0.33     | —        | -0.28    | -        | -0.26    | 0.24     | —        | —        | —        | -0.05    | —        | —        | -0.31    | -0.02    | -0.02    | -0.03    | -0.07    |
| M3          | -0.49    | -0.59    | 0.21     | -0.03    | —        | -0.34    | —        | 0.12     | -0.13    | —        | -0.04    | —        | —        | 0.06     | -0.02    | 0.12     | —        | 0.30     | -0.05    | -0.01    | -0.02    | -0.07    |
| M4          | -0.49    | -0.18    | -1.35    | 0.30     | —        | -0.22    | —        | -0.05    | 0.03     | 0.08     | —        | —        | —        | —        | -0.08    | 0.02     | —        | -0.26    | -0.05    | -0.03    | -0.05    | -0.20    |
| M5          | -0.29    | -0.18    | 0.66     | 0.12     | —        | -0.04    | —        | -0.08    | -0.16    | -0.16    | -0.49    | —        | —        | -0.27    | -0.15    | -0.08    | 0.17     | -0.29    | -0.07    | -0.05    | -0.04    | 0.20     |
| M6          | -1.77    | -1.27    | -0.32    | -0.85    | —        | -0.71    | —        | -0.24    | -0.40    | —        | -0.41    | —        | 1.78     | -0.24    | -0.18    | -0.09    | —        | -1.73    | 0.16     | 0.17     | 0.13     | —        |
| M7          | -1.37    | -0.44    | -0.43    | 0.05     | —        | 0.14     | —        | -0.53    | -0.34    | —        | -0.37    | —        | —        | —        | -0.15    | -0.08    | —        | -1.25    | -0.08    | -0.11    | -0.11    | -0.14    |
| M8          | -1.28    | -0.36    | -1.51    | -0.13    | —        | -0.29    | —        | 0.08     | -0.14    | —        | -0.29    | 1.01     | 0.52     | 0.15     | -0.12    | -0.20    | —        | -0.09    | -0.17    | -0.10    | -0.11    | -0.22    |
| M9          | -0.57    | -0.54    | -0.41    | -0.30    | —        | 0.12     | —        | 0.16     | -0.10    | —        | 0.24     | —        | —        | —        | -0.12    | -0.31    | —        | 0.27     | -0.09    | -0.09    | -0.09    | 0.02     |
| M10         | -0.76    | -0.44    | -0.49    | -0.19    | —        | -0.44    | —        | 0.07     | -0.10    | 0.23     | 0.05     | —        | —        | -0.27    | -0.15    | 0.02     | -0.08    | 0.74     | -0.11    | -0.08    | -0.10    | -0.16    |
| M11         | -1.58    | -1.12    | -0.07    | -0.58    | —        | -0.34    | —        | -        | -0.32    | —        | -0.94    | —        | 0.21     | -0.24    | -0.18    | -0.24    | —        | -0.38    | -0.08    | -0.08    | -0.09    | -0.18    |
| M12         | -1.44    | -1.12    | -0.13    | -0.45    | —        | —        | —        | -0.19    | -0.09    | —        | -0.43    | —        | —        | 0.03     | -0.18    | -0.05    | —        | -0.82    | -0.17    | -0.08    | -0.09    | -0.16    |
| M13         | -1.10    | -0.62    | 0.08     | 0.14     | —        | —        | —        | —        | -0.27    | —        | -0.55    | —        | —        | -0.27    | -0.12    | 0.09     | —        | -0.82    | -0.08    | —        | -0.08    | -0.04    |
| M14         | -0.76    | -0.54    | -0.03    | -0.52    | -0.87    | 0.68     | —        | -0.79    | 0.10     | —        | -0.46    | 0.16     | —        | -0.27    | -0.05    | -0.12    | -0.12    | -0.35    | -0.09    | -0.08    | -0.09    | 0.02     |
| M15         | 1.77     | -0.26    | -1.41    | 2.68     | —        | -0.54    | —        | -0.77    | 1.29     | —        | 0.74     | —        | —        | —        | -0.77    | 0.21     | —        | 0.17     | 0.03     | 0.15     | 0.11     | 0.27     |
| M16         | -1.03    | -0.46    | -1.34    | -0.76    | —        | —        | 1.47     | —        | -1.33    | 1.01     | 0.65     | —        | 0.63     | -0.17    | -0.84    | 0.21     | 0.09     | 0.11     | -0.14    | —        | 0.08     | 0.25     |
| M17         | 1.97     | -0.61    | -1.41    | -0.88    | —        | —        | 1.40     | —        | -0.94    | 0.98     | 0.77     | 1.17     | 0.63     | —        | -0.84    | 0.24     | 0.08     | —        | -0.35    | —        | 0.05     | —        |
| M18         | 1.90     | -0.49    | -1.28    | 2.80     | —        | 0.16     | -1.76    | —        | 1.18     | 1.04     | -1.59    | —        | 0.67     | —        | -0.84    | 0.20     | 0.06     | 0.07     | -0.27    | —        | 0.09     | 0.11     |
| M19         | 1.86     | -        | -1.21    | 2.80     | —        | —        | 1.50     | —        | 1.23     | 1.01     | 0.52     | —        | -0.71    | -0.87    | -0.12    | -0.14    | -0.17    | 0.06     | 0.03     | —        | 0.07     | —        |
| M20         | 1.16     | -0.42    | -1.87    | 2.23     | —        | 0.03     | -0.30    | —        | -0.87    | 1.01     | 0.77     | —        | -0.48    | —        | -0.85    | 0.28     | -0.26    | 0.04     | -0.28    | —        | —        | —        |
| M21         | -1.98    | -1.05    | -0.16    | -1.85    | —        | —        | -0.83    | —        | 1.26     | -0.36    | 0.81     | —        | -1.00    | 0.41     | -0.84    | -0.28    | -0.13    | -0.06    | -1.23    | —        | —        | —        |
| M22         | 1.77     | 1.88     | -0.21    | -1.35    | —        | —        | -1.09    | 0.97     | 1.43     | 0.73     | -0.74    | —        | -0.37    | -0.17    | -0.87    | -0.12    | -0.15    | -0.08    | 0.09     | —        | -0.36    | -0.22    |
| M23         | -1.36    | 1.57     | -0.21    | -1.05    | —        | —        | 0.63     | 0.81     | -1.13    | -0.05    | -0.52    | —        | -1.91    | 0.07     | -0.87    | -0.41    | 0.21     | -0.08    | -0.49    | —        | -0.22    | -0.08    |
| M24         | 1.86     | 1.94     | -0.34    | 2.87     | 0.60     | —        | 1.15     | 0.97     | -1.02    | 1.05     | 0.21     | —        | 0.44     | —        | -0.87    | -0.09    | 0.05     | -0.08    | -0.30    | —        | 0.03     | —        |
| M25         | 1.07     | 0.02     | -1.90    | 3.35     | —        | —        | -0.50    | —        | -0.70    | -0.86    | -0.07    | —        | -1.34    | -1.57    | -0.77    | -125     | -0.09    | -0.37    | -0.12    | —        | -1.26    | —        |
| M26         | 0.86     | 0.42     | -0.16    | 2.87     | —        | -1.45    | 1.16     | —        | -0.90    | 0.93     | -0.96    | —        | 0.39     | -0.63    | -0.92    | -        | 0.08     | -0.27    | -0.14    | —        | -0.17    | —        |
| M27         | -1.17    | -0.24    | -1.47    | —        | -        | -0.58    | —        | 1.36     | 1.28     | 0.97     | 0.94     | —        | —        | —        | -0.87    | —        | —        | 0.10     | -0.03    | -1.57    | 0.07     | -0.22    |
| M28         | 0.83     | —        | -0.45    | 1.12     | 1.16     | -0.06    | —        | 1.20     | 0.72     | 0.81     | 0.66     | —        | —        | 0.35     | -0.17    | -0.25    | —        | -1.05    | -0.39    | -0.63    | -0.33    | -0.08    |
| M29         | 0.93     | —        | -1.29    | —        | -0.49    | —        | —        | 1.34     | 1.29     | 0.84     | —        | 0.82     | —        | 0.36     | -0.17    | -0.34    | —        | 0.30     | —        | —        | —        | —        |
| M30         | 0.88     | —        | -1.29    | —        | 0.79     | —        | —        | 1.30     | 0.96     | —        | —        | —        | 0.38     | 0.57     | -0.19    | -0.37    | —        | 0.65     | —        | —        | —        | -1.45    |
| M31         | -0.65    | —        | -0.42    | —        | -0.49    | —        | —        | 1.06     | 1.24     | —        | —        | —        | —        | 0.02     | -0.20    | —        | —        | 0.18     | 1.21     | —        | —        | -0.58    |
| M32         | -0.34    | —        | -1.52    | 0.59     | -0.84    | —        | —        | -1.43    | 0.99     | 0.76     | —        | —        | 1.03     | 0.17     | -0.22    | —        | —        | —        | —        | —        | —        | -0.06    |
| M33         | -0.29    | —        | -0.36    | 0.58     | 1.51     | —        | —        | 1.29     | —        | 0.84     | —        | —        | —        | -0.08    | —        | —        | —        | —        | —        | -0.14    | —        | —        |
| M34         | -1.88    | -0.11    | -0.32    | 0.63     | —        | -0.22    | -1.76    | —        | 0.95     | 0.84     | —        | —        | 1.01     | -0.06    | -0.19    | —        | —        | —        | -0.82    | —        | —        | —        |
| M35         | 0.93     | —        | -0.34    | 0.21     | —        | -0.08    | 1.31     | -1.38    | 0.83     | 0.84     | 0.66     | —        | —        | -0.18    | -0.18    | —        | —        | 0.47     | -0.35    | 0.66     | 0.94     | —        |
| M36         | -0.20    | -0.19    | -1.35    | 0.66     | 0.78     | —        | -1.79    | -1.29    | 0.96     | 0.77     | —        | —        | —        | -0.19    | -0.19    | 0.47     | —        | 0.69     | -0.81    | —        | 0.66     | —        |
| M37         | -1.10    | -0.22    | -1.42    | 0.57     | —        | —        | 1.22     | 0.64     | 0.82     | 0.84     | —        | -        | -0.12    | -0.08    | -0.22    | 0.69     | —        | —        | -0.88    | —        | —        | —        |
| M38         | -0.34    | —        | -1.45    | 0.28     | —        | -1.19    | 1.04     | 1.40     | 1.29     | 0.84     | -0.72    | —        | —        | -0.07    | -0.22    | —        | —        | -0.22    | -0.48    | -1.57    | -0.72    | —        |
| M39         | 0.88     | —        | -1.29    | —        | —        | 0.75     | 0.69     | 1.10     | 1.15     | 0.87     | -0.43    | —        | —        | 0.09     | -0.20    | 1.07     | —        | -0.08    | -0.77    | -0.63    | -1.43    | —        |
| M40         | -1.47    | 1.16     | -1.22    | -0.70    | 0.26     | 0.67     | 0.71     | 1.25     | 1.03     | —        | -0.64    | —        | —        | 0.06     | 0.21     | 1.15     | 0.87     | —        | -0.09    | —        | -0.64    | 0.47     |
| M41         | -1.35    | —        | -1.35    | -0.40    | —        | 0.54     | —        | 1.25     | 1.06     | 0.84     | -1.12    | —        | —        | —        | -0.13    | —        | —        | 0.21     | -1.57    | —        | -1.12    | 0.69     |

| Samp<br>les | IM<br>01 | IM<br>02 | IM<br>03 | IM<br>04 | IM<br>05 | IM<br>06 | IM<br>07 | IM<br>08 | IM<br>09 | IM<br>10 | IM<br>11 | IM<br>12 | IM<br>13 | IM<br>14 | IM<br>15 | IM<br>16 | IM<br>17 | IM<br>18 | IM<br>19 | IM<br>20 | IM<br>21 | IM<br>22 |
|-------------|----------|----------|----------|----------|----------|----------|----------|----------|----------|----------|----------|----------|----------|----------|----------|----------|----------|----------|----------|----------|----------|----------|
| M42         | 1.88     | —        | -1.22    | -0.19    | —        | -1.28    | —        | 1.36     | 0.89     | -0.35    | 0.23     | —        | -0.25    | 0.14     | 0.32     | —        | —        | 0.12     | -0.63    | —        | -        | 0.97     |
| M43         | -1.87    | 0.4      | -1.29    | -0.19    | —        | 0.66     | —        | —        | 0.91     | -0.24    | —        | -        | —        | 0.11     | 0.27     | -1.64    | —        | 0.42     | -1.45    | -1.28    | -0.15    | —        |
| M44         | 1.77     | 0.2      | -0.17    | -0.19    | —        | 0.61     | 0.35     | 1.20     | -1.16    | —        | -0.25    | —        | -0.25    | 0.11     | 0.40     | -1.56    | -1.27    | —        | -0.58    | 0.66     | —        | —        |
| M45         | -1.50    | —        | -0.14    | —        | —        | —        | —        | —        | 0.87     | 0.52     | 0.15     | —        | —        | 0.11     | 0.39     | —        | —        | —        | —        | -1.28    | -0.36    | —        |
| M46         | -1.42    | -0.15    | -1.79    | —        | —        | -0.96    | —        | 0.85     | 0.57     | 0.35     | —        | —        | —        | —        | 0.09     | -0.16    | —        | 0.62     | 0.62     | 0.66     | -0.20    | —        |
| M47         | 1.93     | -0.96    | -0.04    | -0.19    | —        | —        | —        | 0.79     | 0.75     | —        | —        | —        | —        | 0.20     | -0.19    | —        | —        | -0.22    | -0.22    | —        | -0.21    | —        |
| M48         | 1.93     | —        | -1.35    | -0.19    | -0.92    | —        | —        | 1.25     | 0.08     | 1.09     | —        | —        | —        | 0.06     | -0.18    | —        | —        | -0.08    | -0.08    | —        | -0.36    | —        |
| M49         | -1.91    | 0.32     | -1.34    | -0.19    | —        | -0.96    | 1.20     | -1.20    | 1.02     | 1.25     | 1.29     | —        | -0.25    | 0.25     | -0.16    | 0.35     | —        | -0.76    | -0.76    | —        | -0.36    | —        |
| M50         | -1.91    | —        | -1.35    | -0.19    | 1.24     | —        | -1.10    | 1.06     | 1.08     | —        | —        | —        | —        | 0.39     | -0.19    | —        | —        | 0.08     | 0.08     | —        | -0.34    | —        |
| M51         | -1.67    | —        | -1.17    | -0.19    | -0.15    | —        | -1.87    | 1.08     | 0.97     | —        | —        | —        | -0.34    | -0.01    | -0.08    | —        | —        | -0.16    | -0.16    | —        | -0.32    | —        |
| M52         | -1.01    | 0.21     | -0.22    | -0.19    | -0.96    | —        | 1.28     | 0.74     | 0.98     | 0.52     | 0.15     | —        | -0.52    | 0.10     | 0.22     | -0.16    | —        | -0.72    | -0.72    | —        | -0.36    | —        |
| M53         | -1.67    | —        | -0.27    | -0.19    | -1.04    | —        | —        | 1.15     | 0.77     | —        | —        | —        | —        | -0.17    | -0.19    | —        | —        | -0.43    | -0.43    | —        | —        | —        |
| M54         | -1.43    | -1.10    | -0.42    | -0.19    | 1.04     | —        | —        | 1.25     | 1.02     | —        | —        | —        | —        | 0.01     | -0.08    | —        | —        | -0.64    | —        | —        | -0.36    | —        |
| M55         | -1.61    | -0.45    | -0.34    | -0.19    | -0.92    | —        | —        | 1.03     | 1.06     | —        | -0.34    | -        | —        | —        | -0.13    | 1.02     | —        | -1.12    | -0.94    | —        | -0.38    | 0.98     |
| M56         | -1.37    | -0.01    | -0.34    | -0.38    | —        | 0.34     | 0.63     | 1.17     | 1.02     | 0.85     | -0.52    | —        | -0.16    | -0.32    | -0.19    | -0.22    | —        | 0.34     | -0.25    | —        | -0.34    | —        |
| M57         | 1.64     | -1.73    | -0.29    | -0.19    | —        | -0.55    | 0.69     | 1.25     | 0.80     | -0.37    | —        | —        | —        | -0.29    | -0.24    | -0.28    | —        | -0.55    | -0.58    | —        | -0.26    | —        |
| M58         | 0.93     | -1.56    | -0.27    | -0.19    | —        | -0.94    | -0.68    | 1.25     | 1.29     | 0.91     | —        | —        | —        | 0.06     | -0.12    | -        | —        | -0.94    | -0.53    | -0.35    | -0.32    | —        |
| M59         | -1.56    | -1.64    | -0.10    | -0.19    | —        | -1.21    | —        | 0.97     | -1.36    | 0.63     | —        | —        | —        | 0.12     | -0.16    | -0.18    | —        | -1.10    | -0.94    | -0.41    | -0.33    | -1.10    |
| M60         | —        | -0.56    | -1.45    | -0.19    | —        | 0.22     | -0.06    | -1.48    | 1.06     | 1.24     | —        | —        | —        | 0.42     | -0.19    | -0.28    | —        | 0.22     | —        | -0.41    | -0.36    | 0.22     |
| M61         | -0.87    | -1.00    | -1.33    | -0.19    | —        | -1.24    | 0.85     | 1.15     | 1.02     | 1.02     | —        | —        | —        | —        | -0.19    | 0.20     | —        | -1.02    | -0.20    | -0.37    | -0.36    | -1.10    |
| M62         | -0.86    | -0.91    | -0.29    | -0.49    | —        | -0.94    | 0.35     | 1.29     | 0.84     | 0.84     | -0.52    | —        | -0.18    | 0.12     | -0.20    | -0.28    | -1.64    | —        | —        | —        | -0.36    | —        |
| M63         | -1.04    | —        | -1.40    | -0.19    | 1.13     | -0.25    | 0.69     | 1.25     | —        | 0.85     | —        | —        | -0.28    | 0.24     | -0.22    | —        | -1.56    | -0.25    | -0.38    | -0.38    | -0.36    | 0.78     |
| M64         | -0.74    | —        | -0.45    | -0.19    | —        | -0.58    | -0.96    | —        | 1.11     | 0.78     | -0.13    | —        | 0.20     | 0.21     | -0.23    | -0.82    | —        | -0.58    | -0.40    | -0.40    | -0.36    | —        |
| M65         | 0.83     | —        | -0.48    | -0.19    | —        | -0.53    | —        | -0.13    | 0.77     | 0.78     | -1.51    | —        | —        | 0.28     | -0.23    | —        | —        | -0.53    | -0.11    | -0.11    | -0.38    | —        |
| M66         | -1.13    | -1.13    | -0.45    | -1.13    | —        | 0.15     | 0.35     | -1.51    | 1.24     | —        | -0.46    | —        | -0.38    | 0.20     | -0.20    | 0.28     | -0.23    | —        | -0.53    | —        | —        | —        |
| M67         | 0.93     | —        | -0.45    | —        | -1.13    | —        | —        | -0.46    | 1.02     | —        | —        | —        | —        | 0.24     | -0.20    | —        | —        | —        | —        | —        | —        | —        |
| M68         | -0.62    | 0.77     | -1.48    | -1.17    | —        | -1.21    | -0.34    | —        | 1.13     | -0.87    | -0.41    | 0.21     | -0.08    | —        | -0.23    | -0.87    | -0.41    | 0.21     | -0.08    | —        | —        | —        |
| M69         | -0.31    | 1.24     | -0.36    | —        | -0.34    | -0.82    | -0.52    | -1.25    | 1.20     | —        | —        | 0.82     | —        | 0.15     | -0.25    | —        | —        | -0.38    | -0.38    | —        | —        | —        |
| M70         | -1.83    | —        | —        | —        | -0.52    | —        | —        | 1.25     | 0.80     | 0.87     | -0.20    | —        | —        | -0.09    | -0.14    | -1.64    | —        | —        | —        | —        | —        | —        |
| M71         | 1.97     | -1.13    | -0.10    | -0.19    | —        | 0.94     | 0.35     | 1.20     | 1.06     | 0.90     | -0.23    | —        | —        | -0.06    | -0.10    | -1.56    | —        | -0.08    | -0.49    | -0.11    | -0.22    | —        |
| M72         | -0.36    | —        | -1.21    | —        | -0.20    | —        | —        | 1.43     | -1.13    | -0.05    | —        | —        | —        | 0.49     | -0.87    | —        | —        | -0.34    | —        | —        | -0.10    | -1.56    |
| M73         | 1.86     | —        | -1.34    | —        | -0.23    | —        | —        | -1.25    | -1.02    | 1.05     | —        | —        | —        | 0.49     | -0.87    | —        | —        | -0.52    | —        | —        | —        | —        |
| M74         | -1.98    | -0.10    | -1.16    | 0.77     | —        | 0.52     | 0.15     | —        | 1.26     | -0.36    | 0.81     | —        | -1.64    | —        | -0.84    | -0.96    | -0.29    | —        | -0.13    | —        | —        | —        |
| M75         | 1.77     | -0.09    | -1.21    | 1.24     | —        | 0.52     | 0.15     | -1.15    | 1.43     | 0.73     | -0.74    | —        | -1.56    | 0.49     | -0.87    | 0.05     | -0.52    | —        | -1.51    | —        | —        | 0.23     |
| M76         | 0.07     | -0.10    | -1.90    | —        | —        | -0.38    | —        | 1.30     | -0.20    | -0.86    | -0.07    | —        | —        | 0.53     | -0.77    | -0.38    | —        | —        | -0.46    | 0.49     | -0.87    | 0.23     |
| M77         | 1.86     | —        | -1.16    | —        | —        | —        | -1.13    | —        | -0.90    | 0.93     | -0.96    | -        | —        | 0.54     | -0.92    | —        | —        | -0.16    | —        | —        | —        | 0.23     |
| M78         | -0.76    | 0.77     | 0.30     | -0.19    | —        | -0.96    | -0.29    | 0.07     | -0.10    | -1.98    | 0.05     | —        | —        | —        | -0.15    | -0.34    | —        | -0.07    | -0.11    | -0.08    | -0.10    | —        |
| M79         | -1.58    | 1.24     | -0.07    | -0.19    | —        | 0.05     | -0.52    | -1.13    | -0.32    | -1.13    | -0.94    | —        | -1.13    | —        | -0.18    | -0.52    | —        | -0.07    | -0.08    | -0.08    | -0.09    | —        |

| Samp<br>les | IM<br>01 | IM<br>02 | IM<br>03 | IM<br>04 | IM<br>05 | IM<br>06 | IM<br>07 | IM<br>08 | IM<br>09 | IM<br>10 | IM<br>11 | IM<br>12 | IM<br>13 | IM<br>14 | IM<br>15 | IM<br>16 | IM<br>17 | IM<br>18 | IM<br>19 | IM<br>20 | IM<br>21 | IM<br>22 |
|-------------|----------|----------|----------|----------|----------|----------|----------|----------|----------|----------|----------|----------|----------|----------|----------|----------|----------|----------|----------|----------|----------|----------|
| M80         | 1.86     | -0.83    | -1.21    | -0.87    | 0.8      | —        | 1.50     | -1.04    | 1.23     | 1.06     | 0.52     | —        | 0.26     | -0.08    | -0.92    | -0.86    | —        | —        | -0.86    | —        | —        | —        |
| M81         | 0.16     | -0.40    | -1.87    | -0.19    | —        | -0.08    | -1.06    | -1.20    | -0.87    | 1.01     | 0.77     | —        | —        | -0.26    | -0.85    | —        | —        | 0.04     | -0.28    | 0.08     | 0.05     | 0.23     |
| M82         | -1.09    | -0.04    | -0.03    | -0.19    | —        | -0.26    | —        | -0.28    | -0.08    | 1.01     | 0.24     | —        | —        | —        | -0.05    | —        | —        | 0.02     | -0.02    | -0.02    | —        | -0.07    |
| M83         | -0.10    | —        | 0.04     | -0.19    | —        | —        | 0.92     | —        | -0.27    | -0.26    | -0.55    | —        | -0.27    | —        | -0.12    | —        | —        | -0.07    | -0.05    | —        | -0.08    | —        |
| M84         | -0.76    | -0.86    | -0.03    | -0.19    | 0.48     | —        | -1.00    | —        | 0.10     | -0.94    | -0.46    | —        | -0.39    | —        | -0.05    | -0.47    | —        | -0.06    | —        | —        | -0.26    | 0.78     |
| M85         | -0.29    | —        | 0.34     | -0.19    | —        | —        | 0.32     | -0.08    | -0.16    | -0.25    | -0.49    | —        | 0.03     | —        | -0.05    | -1.21    | —        | -0.02    | —        | —        | -0.08    | —        |
| M86         | -1.44    | -0.86    | -0.13    | -0.19    | —        | —        | -1.24    | -0.19    | -0.09    | -0.58    | -0.43    | —        | -0.35    | —        | -0.18    | -0.82    | —        | -0.09    | -0.87    | —        | —        | 0.66     |
| M87         | 1.77     | —        | -2.41    | -0.19    | —        | 1.10     | —        | 1.43     | 1.29     | 0.20     | 0.74     | —        | —        | —        | -0.77    | —        | —        | 0.17     | —        | -0.05    | —        | —        |
| M88         | -0.87    | —        | -2.30    | -0.19    | —        | 0.86     | -1.34    | 1.15     | -0.83    | 0.90     | 0.52     | —        | -0.83    | —        | -0.77    | —        | —        | 0.18     | -0.06    | —        | 0.63     | -1.18    |
| M89         | -1.77    | —        | -0.32    | -0.19    | —        | —        | 0.13     | -0.24    | -0.40    | 0.97     | -0.41    | —        | 1.69     | -0.05    | 0.03     | 0.63     | -1.18    | 0.15     | 0.16     | —        | —        | —        |
| M90         | -1.37    | —        | 0.26     | -0.19    | —        | 0.14     | -0.57    | -0.53    | -0.04    | -0.53    | -0.37    | —        | —        | —        | -0.15    | -0.05    | —        | -0.09    | -0.08    | —        | 0.59     | -0.05    |
| M91         | -1.28    | -0.83    | 0.87     | -0.16    | —        | -0.29    | -0.86    | 0.08     | -0.14    | 0.15     | -0.29    | —        | —        | -0.87    | -0.12    | —        | —        | —        | -0.17    | -0.10    | —        | —        |
| M92         | -0.57    | 1.69     | 0.96     | -0.86    | —        | 0.12     | 0.10     | —        | -0.10    | -0.47    | 0.24     | —        | 0.59     | —        | -0.12    | —        | —        | -0.07    | -0.09    | —        | —        | 0.02     |
| M93         | 0.86     | -0.25    | -1.34    | -0.16    | -0.94    | 0.87     | 1.29     | -0.94    | 1.52     | -0.02    | 0.48     | 0.63     | -1.18    | 0.37     | —        | —        | —        | —        | -0.19    | 0.09     | —        | 0.21     |
| M94         | -0.05    | -0.58    | -1.34    | —        | -1.21    | 0.96     | -1.01    | -1.21    | -0.71    | 1.01     | —        | —        | —        | -0.19    | —        | —        | —        | -0.87    | -0.13    | 0.09     | —        | 0.18     |
| M95         | -0.49    | -0.53    | 0.77     | —        | 0.12     | —        | -0.47    | 0.12     | -0.13    | 1.01     | —        | —        | —        | -0.16    | -0.02    | 0.12     | —        | —        | -0.05    | -0.01    | —        | -0.07    |
| M96         | -0.49    | —        | 1.58     | —        | -0.05    | —        | —        | -0.05    | 0.03     | -        | —        | —        | —        | -0.27    | -0.08    | 0.02     | —        | —        | -0.05    | -0.03    | —        | —        |
| M97         | -1.87    | —        | -1.30    | —        | 1.15     | —        | —        | 1.15     | -0.83    | 0.08     | —        | —        | -0.87    | -0.27    | —        | 0.13     | —        | —        | -0.06    | 0.12     | —        | 0.23     |
| M98         | 0.77     | -1.02    | -1.34    | —        | 0.81     | —        | —        | 0.81     | 1.11     | 0.97     | —        | —        | —        | -0.24    | -0.79    | 0.27     | —        | —        | —        | 0.12     | —        | 0.25     |
| M99         | 0.77     | —        | -1.47    | —        | 0.90     | —        | —        | 0.90     | -0.77    | 0.97     | —        | —        | -0.47    | 0.03     | -0.79    | 0.16     | —        | —        | 0.02     | 0.11     | -0.86    | 0.06     |
| M100        | 1.58     | —        | -2.53    | —        | 1.39     | —        | -0.08    | 1.39     | -1.10    | 0.97     | —        | —        | -1.21    | 0.21     | -0.84    | 0.14     | —        | —        | -0.07    | 0.09     | —        | —        |
| M101        | -1.83    | -1.02    | -0.47    | —        | 0.66     | 0.66     | -0.26    | 0.66     | -0.91    | 0.94     | —        | —        | -0.82    | 0.57     | -0.82    | 0.15     | —        | —        | -0.02    | 0.11     | —        | 0.11     |
| M102        | -1.64    | -0.09    | -0.13    | —        | 0.98     | —        | —        | 0.98     | 1.11     | 1.01     | —        | —        | —        | -0.62    | -0.20    | -0.19    | —        | —        | -0.07    | 0.12     | -0.86    | -0.48    |
| M103        | 1.86     | 0.89     | -1.34    | —        | 0.59     | -0.08    | 0.12     | 0.59     | -1.29    | 0.39     | —        | —        | —        | -0.30    | -0.84    | —        | —        | -0.83    | -0.06    | 0.06     | 1.06     | 0.07     |
| M104        | -0.84    | 0.39     | -1.21    | —        | 2.01     | -0.26    | —        | 2.01     | 1.03     | 0.97     | —        | —        | —        | -0.24    | -0.86    | —        | —        | 1.69     | -0.11    | 0.42     | -0.30    | —        |
| M105        | 0.71     | -0.49    | -0.82    | —        | —        | —        | —        | 1.89     | -0.41    | 1.85     | —        | —        | —        | -0.13    | 1.06     | 0.11     | -0.87    | —        | —        | 0.10     | -0.86    | —        |
| M106        | 0.55     | —        | -1.18    | —        | -0.87    | —        | —        | -0.87    | 1.02     | 1.92     | -0.79    | —        | -0.08    | 0.35     | -0.30    | 0.06     | —        | —        | 0.09     | 0.20     | —        | 0.35     |
| M107        | 1.17     | —        | 0.76     | —        | 1.72     | —        | —        | 1.72     | -0.75    | 1.71     | —        | —        | -0.26    | 0.60     | —        | —        | —        | —        | -0.08    | -0.04    | —        | 0.60     |
| M108        | 1.74     | —        | -0.44    | —        | 1.93     | 0.63     | -1.18    | 1.93     | 0.15     | 1.89     | —        | —        | —        | -0.21    | —        | -0.58    | —        | —        | -0.03    | -0.39    | —        | —        |
| M109        | 1.44     | -0.83    | 2.00     | —        | 1.01     | 0.63     | -1.18    | 0.01     | 1.20     | -0.47    | —        | —        | —        | -0.14    | -0.86    | 0.68     | —        | —        | -0.10    | -0.67    | —        | —        |
| M110        | 1.50     | —        | 1.95     | —        | 0.10     | —        | —        | 0.10     | 1.07     | -0.83    | —        | 0.63     | -1.18    | 0.57     | —        | -0.77    | —        | —        | —        | 0.43     | -0.08    | 0.23     |
| M111        | 1.17     | —        | 0.75     | —        | 4.53     | —        | —        | 1.53     | 1.42     | 1.69     | —        | —        | —        | 0.62     | 9.58     | —        | —        | -0.83    | 1.06     | 0.24     | -0.26    | 0.19     |
| M112        | -1.17    | -1.02    | -1.02    | —        | -0.75    | —        | —        | -0.75    | 0.02     | -1.02    | —        | —        | -0.86    | 0.16     | -0.79    | -0.35    | —        | 1.69     | 0.27     | 0.42     | —        | 0.29     |
| M113        | -0.64    | —        | 0.70     | —        | -0.44    | —        | 0.66     | -0.44    | -0.02    | 1.90     | —        | —        | —        | 0.37     | -0.26    | 0.02     | —        | —        | -1.02    | -0.03    | -0.08    | -0.09    |
| M114        | 1.50     | —        | 1.56     | —        | 2.00     | —        | —        | 1.00     | -0.06    | -1.19    | —        | —        | 1.71     | 0.59     | 1.08     | -0.26    | —        | —        | -0.09    | 0.52     | —        | -0.77    |
| M115        | 1.17     | -0.25    | -0.78    | —        | 1.95     | —        | 0.59     | 1.95     | -1.68    | 1.71     | —        | —        | 1.89     | 0.11     | —        | -0.15    | —        | —        | -0.06    | 0.24     | -0.25    | 0.28     |
| M116        | 0.60     | -0.58    | 1.56     | —        | 1.85     | —        | —        | 1.85     | 1.07     | 1.84     | —        | —        | —        | 0.40     | —        | 0.12     | —        | —        | -0.15    | -0.73    | -0.58    | 0.23     |

| Samp<br>les | IM<br>01 | IM<br>02 | IM<br>03 | IM<br>04 | IM<br>05 | IM<br>06 | IM<br>07 | IM<br>08 | IM<br>09 | IM<br>10 | IM<br>11 | IM<br>12 | IM<br>13 | IM<br>14 | IM<br>15 | IM<br>16 | IM<br>17 | IM<br>18 | IM<br>19 | IM<br>20 | IM<br>21 | IM<br>22 |
|-------------|----------|----------|----------|----------|----------|----------|----------|----------|----------|----------|----------|----------|----------|----------|----------|----------|----------|----------|----------|----------|----------|----------|
| M117        | 1.55     | -0.53    | -1.19    | —        | 1.76     | —        | —        | 1.76     | 0.22     | 1.65     | —        | —        | —        | -0.41    | 0.66     | —        | —        | 0.66     | -0.09    | -0.59    | -0.53    | —        |
| M118        | 1.77     | —        | 1.58     | —        | 1.04     | -0.54    | —        | 1.04     | -0.48    | -0.91    | —        | —        | -0.55    | -0.49    | 1.07     | 0.09     | —        | —        | -0.35    | 0.43     | 0.31     | 0.32     |
| M119        | 0.44     | -0.58    | -0.34    | —        | -0.72    | —        | —        | -0.72    | -1.11    | 10       | —        | —        | —        | 0.27     | 1.07     | —        | —        | -0.58    | -0.37    | 0.48     | —        | 0.32     |
| M120        | 0.69     | —        | -1.13    | —        | -0.67    | —        | —        | -0.67    | 1.04     | 1.96     | —        | —        | —        | -0.35    | 1.04     | -0.13    | —        | —        | -0.26    | -0.70    | 0.01     | 0.24     |
| M121        | 0.01     | —        | -1.29    | —        | -1.26    | -0.43    | -0.26    | -1.26    | -1.07    | 1.93     | —        | —        | —        | -0.41    | 1.06     | -0.03    | —        | —        | -0.24    | 0.48     | -0.71    | —        |
| M122        | 1.50     | —        | -0.46    | —        | -1.84    | —        | —        | -1.84    | -0.36    | 1.86     | —        | —        | —        | -0.08    | —        | -0.64    | —        | 1.50     | -0.09    | 0.34     | —        | -0.11    |
| M123        | 0.74     | —        | -0.74    | —        | -1.03    | —        | —        | -1.03    | 1.02     | 1.88     | —        | —        | -0.58    | -0.70    | —        | -1.15    | —        | —        | -0.17    | -0.73    | —        | 0.32     |
| M124        | -0.63    | -0.55    | -0.30    | —        | 1.89     | —        | -0.26    | 1.89     | 1.02     | 1.76     | —        | —        | —        | -0.49    | —        | -1.10    | —        | —        | -0.09    | -0.71    | 0.42     | 0.58     |
| M125        | 1.36     | —        | 1.54     | —        | 1.05     | —        | -1.46    | 1.05     | 1.95     | -0.54    | —        | —        | —        | -0.52    | 1.03     | -0.02    | —        | —        | -0.12    | 0.42     | -0.69    | —        |
| M126        | 1.55     | —        | -1.20    | —        | 1.60     | —        | -0.44    | 1.60     | 0.18     | 1.80     | —        | —        | —        | -0.38    | -0.78    | -0.69    | —        | —        | -0.50    | 0.44     | 0.68     | —        |
| M127        | 1.46     | —        | 1.58     | —        | -0.73    | 1.98     | 1.82     | -0.73    | 0.38     | 1.83     | —        | —        | -0.61    | -0.38    | —        | -0.05    | —        | —        | -0.37    | -0.71    | -0.71    | -0.08    |
| M128        | 1.55     | —        | 0.24     | —        | 1.94     | —        | -0.20    | 1.94     | -0.02    | 1.75     | —        | —        | -0.23    | -0.81    | 1.07     | 0.18     | —        | —        | -0.18    | 0.25     | 0.07     | 0.28     |
| M129        | -1.47    | —        | 1.54     | —        | 1.94     | -0.61    | -1.56    | 1.94     | 1.07     | 1.75     | —        | —        | —        | 0.08     | 1.06     | 0.12     | —        | -0.62    | -0.12    | -0.74    | -0.10    | -1.01    |
| M130        | 0.38     | 1.66     | -0.91    | —        | -0.12    | -0.23    | —        | -0.12    | 1.02     | 1.80     | —        | —        | —        | 0.02     | 0.08     | 0.16     | —        | —        | -0.19    | 0.47     | 0.22     | -0.76    |
| M131        | 0.65     | -1.76    | 1.42     | —        | —        | —        | —        | 1.02     | 1.98     | 1.71     | —        | —        | —        | -0.04    | —        | 0.55     | —        | —        | -0.01    | 0.42     | -0.71    | -0.05    |
| M132        | 0.50     | 1.21     | -1.23    | —        | 1.99     | —        | -0.35    | 1.99     | 1.98     | 1.75     | —        | —        | 1.50     | -0.49    | —        | -0.11    | —        | -0.68    | -0.62    | 0.41     | —        | —        |
| M133        | 0.58     | 1.48     | 0.07     | —        | 1.79     | -0.58    | —        | 1.79     | -0.79    | 1.71     | —        | —        | —        | -0.52    | -0.59    | 0.22     | —        | —        | -0.28    | -0.73    | 0.02     | —        |
| M134        | 1.69     | -1.18    | -0.38    | —        | -0.25    | —        | —        | -0.25    | 1.98     | 1.60     | -0.55    | —        | —        | 0.12     | —        | —        | —        | -0.08    | -0.39    | 0.23     | -0.73    | -0.59    |
| M135        | 0.34     | -1.19    | 1.53     | —        | 1.93     | —        | —        | 1.93     | 0.01     | 1.72     | —        | —        | —        | -0.26    | 1.04     | -0.11    | —        | -0.26    | -0.04    | 0.41     | —        | —        |
| M136        | 0.44     | 0.66     | -1.60    | —        | -0.19    | —        | —        | -0.19    | -0.23    | 1.75     | —        | —        | —        | -0.05    | 1.04     | -0.07    | —        | -0.29    | -0.37    | —        | —        | —        |
| M137        | 1.31     | —        | -1.00    | —        | -0.05    | —        | —        | -0.05    | 0.07     | 1.61     | —        | —        | —        | -0.88    | 1.04     | 0.55     | —        | -0.08    | 0.23     | —        | —        | —        |
| M138        | 1.50     | —        | -1.16    | —        | -0.62    | —        | —        | -0.62    | 1.98     | -        | —        | —        | -0.73    | -0.68    | —        | 0.02     | —        | —        | -0.17    | -0.72    | -0.43    | -0.26    |
| M139        | 1.31     | —        | 1.39     | —        | 0.05     | -0.55    | —        | 0.05     | -1.24    | -0.81    | —        | —        | —        | -0.76    | -0.61    | -0.55    | —        | -0.87    | 0.68     | 0.45     | —        | —        |
| M140        | -1.25    | —        | -0.50    | -0.16    | 0.01     | —        | 1.88     | 0.01     | -0.58    | 1.71     | —        | —        | -0.59    | -0.74    | -0.23    | -1.26    | —        | 0.27     | -0.16    | —        | —        | 1.68     |
| M141        | 1.55     | -0.73    | -0.39    | —        | -1.01    | 1.50     | —        | -1.01    | -0.03    | 1.92     | —        | —        | —        | 0.07     | —        | -1.24    | —        | —        | -0.34    | -0.04    | —        | —        |
| M142        | 0.31     | —        | 1.56     | —        | -0.32    | —        | 1.88     | -0.32    | -0.35    | 0.01     | —        | —        | —        | -0.77    | -        | -0.29    | —        | —        | -0.34    | 0.55     | —        | -0.59    |
| M143        | 1.64     | —        | -0.78    | —        | 1.82     | —        | —        | —        | -0.65    | 1.88     | —        | —        | —        | -1.27    | —        | -0.62    | —        | -0.62    | 0.10     | 0.42     | 0.31     | -0.02    |
| M144        | 0.74     | —        | 1.56     | —        | 1.10     | —        | -0.08    | 1.10     | -0.18    | 1.74     | —        | —        | —        | -0.44    | -0.87    | -0.29    | —        | —        | 0.06     | —        | 0.34     | -0.01    |
| M145        | 1.12     | —        | -1.19    | —        | 1.93     | -0.55    | -0.26    | 1.93     | -1.31    | 1.63     | —        | 0.35     | —        | -0.13    | 0.27     | 0.30     | —        | —        | -0.80    | 0.01     | 0.29     | 0.34     |
| M146        | -0.01    | —        | 1.58     | —        | 1.86     | —        | -0.29    | 1.86     | -0.58    | 1.68     | —        | —        | -0.29    | -1.29    | —        | -0.19    | —        | -0.18    | -0.32    | 0.44     | 0.44     | —        |
| M147        | -0.55    | —        | -0.34    | —        | 0.14     | -0.43    | -0.26    | 0.14     | -0.69    | 1.71     | 0.35     | —        | —        | -0.49    | -0.83    | -0.30    | —        | —        | -0.15    | 0.46     | —        | —        |
| M148        | -0.36    | —        | -1.13    | —        | 1.08     | —        | —        | 1.08     | 0.40     | 1.04     | —        | —        | —        | -0.52    | -0.97    | -0.10    | —        | -0.59    | 0.05     | —        | 1.68     | -0.65    |
| M149        | -0.52    | —        | -1.29    | —        | -0.34    | —        | —        | -0.34    | 1.05     | 1.11     | —        | —        | —        | -0.05    | -0.57    | -1.10    | —        | —        | -0.11    | -0.69    | —        | -0.80    |
| M150        | -1.46    | —        | -0.46    | —        | -0.57    | —        | —        | -0.57    | 0.32     | 1.76     | —        | —        | -1.08    | -0.08    | —        | -1.47    | —        | -0.59    | 0.07     | -0.32    | 0.24     | 0.35     |
| M151        | -1.64    | —        | -0.74    | —        | 0.43     | —        | —        | 5.43     | 0.41     | 1.75     | —        | —        | —        | 0.37     | -0.58    | 1.45     | —        | —        | -0.18    | 0.25     | 1.81     | 1.23     |
| M152        | -1.88    | —        | -0.30    | —        | -1.08    | —        | —        | -1.08    | 0.24     | 0.20     | —        | —        | —        | -0.06    | —        | -0.27    | —        | -0.62    | —        | -0.64    | -0.64    | 0.32     |
| M153        | 0.55     | —        | 1.54     | —        | -0.71    | 1.64     | —        | -0.71    | 0.31     | 1.86     | —        | —        | —        | -0.02    | 1.11     | -0.10    | —        | —        | -0.09    | -0.64    | -0.64    | —        |
| M154        | 0.83     | -0.55    | -1.20    | —        | 2.00     | —        | -0.62    | 2.00     | 1.01     | 1.67     | —        | —        | —        | 0.21     | -0.72    | 0.24     | —        | -0.62    | -0.15    | —        | 0.48     | 0.29     |

| Samp<br>les | IM<br>01 | IM<br>02 | IM<br>03 | IM<br>04 | IM<br>05 | IM<br>06 | IM<br>07 | IM<br>08 | IM<br>09 | IM<br>10 | IM<br>11 | IM<br>12 | IM<br>13 | IM<br>14 | IM<br>15 | IM<br>16 | IM<br>17 | IM<br>18 | IM<br>19 | IM<br>20 | IM<br>21 | IM<br>22 |
|-------------|----------|----------|----------|----------|----------|----------|----------|----------|----------|----------|----------|----------|----------|----------|----------|----------|----------|----------|----------|----------|----------|----------|
| M155        | -1.98    | —        | 1.58     | —        | -0.29    | —        | -0.75    | -0.29    | 1.08     | 1.67     | —        | —        | -0.48    | 0.11     | 1.14     | -0.20    | —        | -0.75    | -0.10    | —        | 0.47     | 0.31     |
| M156        | 0.65     | —        | 0.24     | —        | 0.21     | —        | -0.71    | 0.21     | -0.79    | —        | —        | —        | —        | -0.69    | -0.65    | -0.18    | —        | -0.71    | -0.33    | -0.62    | —        | 0.30     |
| M157        | 0.79     | —        | 1.54     | —        | -0.46    | 0.26     | —        | -0.46    | 0.08     | 1.67     | —        | —        | —        | 1.80     | —        | -0.08    | —        | —        | -0.17    | 0.56     | —        | 0.31     |
| M158        | 1.98     | —        | -0.91    | —        | -0.22    | —        | —        | -0.22    | 0.15     | 1.66     | —        | —        | —        | 0.82     | -0.52    | -0.17    | —        | -0.48    | —        | -0.63    | —        | —        |
| M159        | -1.79    | —        | 1.42     | -0.16    | -1.08    | 1.75     | —        | -1.08    | 1.97     | 1.16     | —        | —        | -0.07    | -0.17    | -0.26    | -0.45    | —        | -0.43    | -0.30    | -0.60    | 0.50     | —        |
| M160        | -1.64    | -0.78    | -1.23    | —        | 0.12     | 0.01     | —        | 0.12     | -0.36    | -1.14    | —        | —        | 0.57     | -0.04    | 0.26     | 1.62     | —        | -1.09    | -0.08    | 0.53     | 0.45     | -0.34    |
| M161        | -0.88    | -0.10    | 0.07     | —        | 1.03     | -0.71    | —        | 1.03     | 1.05     | -1.46    | —        | 1.68     | —        | -0.69    | 1.13     | 0.23     | —        | —        | -0.11    | 0.44     | 0.42     | —        |
| M162        | -0.55    | 0.48     | -0.38    | —        | 1.05     | —        | -0.90    | 1.05     | 1.05     | 1.81     | —        | —        | -0.75    | -0.80    | 1.11     | -0.32    | —        | -0.90    | -0.11    | -0.62    | 0.46     | —        |
| M163        | -0.88    | -0.67    | 1.53     | —        | 1.99     | —        | —        | 1.99     | 1.95     | 1.96     | —        | —        | -0.71    | 0.38     | -0.72    | -0.99    | —        | —        | -0.34    | -0.14    | 0.18     | —        |
| M164        | 0.93     | 0.66     | -1.60    | —        | 0.08     | —        | -0.72    | 0.08     | 0.32     | 1.83     | —        | 1.39     | —        | 0.50     | -0.70    | 0.02     | —        | —        | -0.68    | 0.38     | 0.38     | -1.08    |
| M165        | 0.64     | 0.17     | -1.00    | -0.16    | -0.08    | —        | —        | -0.08    | 0.28     | 1.69     | —        | —        | —        | 0.17     | -0.60    | 0.23     | —        | —        | 0.13     | -0.66    | -0.66    | —        |
| M166        | 1.79     | -1.14    | -1.16    | —        | -1.93    | —        | -0.76    | -1.93    | 1.05     | 1.67     | —        | —        | —        | -0.04    | -0.72    | -1.30    | —        | -1.08    | 0.40     | 0.46     | —        | 1.39     |
| M167        | 1.74     | -1.51    | 1.39     | —        | 1.03     | -1.05    | —        | 1.03     | -0.31    | 1.92     | —        | —        | —        | 0.04     | -0.76    | 1.03     | —        | —        | 0.05     | -0.63    | 0.37     | —        |
| M168        | 1.84     | -1.12    | -0.50    | —        | 1.06     | -0.25    | —        | 0.06     | 0.19     | 1.63     | —        | —        | —        | 0.06     | —        | 0.06     | —        | 1.68     | 0.29     | -0.62    | -0.64    | —        |
| M169        | 1.83     | 1.20     | -0.39    | —        | 1.00     | -0.71    | -0.90    | 2.00     | 1.01     | 1.60     | —        | —        | -1.08    | -0.70    | -0.72    | 0.24     | —        | —        | -0.15    | -0.64    | 0.48     | -0.63    |

IM: Target; “—”, unpeaked; when the relative error value is 0, it is indicated by “/”.

Table S3. The relative error in peak area ratio for 22 target substances in the QC sample and samples from real cases to be tested

| Samp<br>les | IM<br>01 | IM<br>02 | IM<br>03 | IM<br>04 | IM<br>05 | IM<br>06 | IM<br>07 | IM<br>08 | IM<br>09 | IM<br>10 | IM<br>11 | IM<br>12 | IM<br>13 | IM<br>14 | IM<br>15 | IM<br>16 | IM<br>17 | IM<br>18 | IM<br>19 | IM<br>20 | IM<br>21 | IM<br>22 |
|-------------|----------|----------|----------|----------|----------|----------|----------|----------|----------|----------|----------|----------|----------|----------|----------|----------|----------|----------|----------|----------|----------|----------|
| M1          | -1.73    | -1.89    | -0.55    | -0.14    | —        | 3.07     | —        | 3.39     | 0.28     | 1.91     | 0.11     | —        | —        | —        | -2.11    | —        | —        | 3.83     | -2.91    | -0.06    | 1.06     | —        |
| M2          | -0.96    | 4.58     | 0.36     | -0.35    | —        | -3.32    | —        | 9.11     | -8.10    | 5.65     | -0.02    | —        | —        | —        | -2.00    | —        | —        | 3.19     | -9.82    | 2.84     | -0.56    | -2.54    |
| M3          | -1.69    | 0.21     | 0.05     | 1.13     | —        | 5.86     | —        | -0.71    | -4.62    | —        | 17.90    | —        | —        | 1.91     | 3.20     | -        | —        | -1.29    | 1.14     | 11.90    | -        | -9.11    |
| M4          | -0.11    | -2.55    | -1.00    | -0.83    | —        | -        | —        | -1.46    | -2.08    | 6.00     | —2       | —        | —        | —        | 1.66     | -3.21    | —        | 4.49     | -0.91    | 7.69     | -        | 0.55     |
| M5          | -1.27    | -1.21    | -0.61    | 2.38     | —        | -        | —        | 15.6     | 0.58     | 3.82     | -0.29    | —        | —        | 1.91     | 2.20     | 6.54     | 9.78     | 2.38     | 2.80     | 9.94     | -        | 11.1     |
| M6          | 1.43     | 0.25     | 1.01     | -0.74    | —        | -1.85    | —        | 7.41     | -1.82    | —        | 3.24     | —        | 6.22     | 5.65     | 0.05     | -6.87    | —        | 0.34     | 3.11     | 11.59    | -7.43    | 0.08     |
| M7          | -1.79    | 0.56     | 0.88     | 13.0     | —        | -2.44    | —        | 2.82     | 5.17     | —        | -2.85    | —        | —        | —        | -1.31    | -9.37    | —        | 3.34     | -0.94    | 12.65    | -9.38    | —        |
| M8          | -2.24    | 0.94     | 0.49     | 4.10     | —        | -0.19    | —        | 1.00     | -9.39    | —        | 8.08     | 3.7      | -        | 4.13     | 4.30     | -2.86    | —        | 1.98     | 0.45     | 11.87    | -        | 10.6     |
| M9          | -2.18    | -0.67    | -0.10    | -1.22    | —        | 3.53     | —        | 4.89     | 6.46     | —        | -1.50    | —        | —        | —        | 4.00     | -2.65    | —        | 0.32     | 1.35     | 14.58    | -        | -        |
| M10         | -1.21    | -0.94    | -1.90    | 1.18     | —        | -        | —        | 13.3     | -0.53    | 1.84     | -1.13    | —        | —        | 3.04     | 2.28     | 0.86     | —        | 3.07     | 3.85     | 12.03    | -        | 3.35     |
| M11         | -2.22    | 0.82     | -0.23    | 1.33     | —        | 8.95     | —        | -3.77    | 1.60     | —        | -4.40    | —        | 9.78     | 3.54     | 4.81     | -5.49    | —        | 4.24     | 0.55     | 13.83    | -        | 3.32     |
| M12         | -1.60    | -1.55    | -1.36    | 3.20     | —        | —        | —        | 3.39     | 1.58     | —        | -6.37    | —        | —        | -6.30    | -0.32    | 14.3     | —        | 2.70     | 2.97     | 10.10    | -        | -0.83    |
| M13         | -1.00    | -3.72    | -1.88    | 1.60     | —        | —        | —        | —        | -0.30    | —        | -4.50    | —        | —        | -4.27    | 0.84     | -2.42    | —        | 5.59     | 4.78     | —        | -4.47    | 2.68     |
| M14         | -3.15    | -1.54    | -0.08    | 2.99     | 3.77     | -2.22    | —        | -        | 3.91     | —        | 3.37     | 9.7      | —        | 3.45     | -3.97    | 13.8     | 9.78     | 4.32     | 0.21     | 10.58    | -9.61    | -5.04    |
| M15         | -4.90    | -2.19    | 1.80     | 2.02     | —        | -1.60    | —        | -        | 1.25     | —        | 5.42     | —        | —        | —        | 10.86    | -1.11    | —        | 3.01     | -1.01    | 10.25    | -8.28    | 18.9     |
| M16         | -1.78    | -0.83    | -6.21    | 7220     | —        | —        | 8.99     | —        | 1.31     | 5.39     | -1.45    | —        | 4.28     | 6.00     | -        | 0.43     | 0.91     | -18.70   | 4.34     | —        | -5.71    | -9.23    |
| M17         | -2.33    | 2.68     | -1.15    | -3.30    | —        | —        | -4.19    | —        | 0.01     | 6.20     | -3.59    | 1.9      | 3.72     | —        | 4.13     | 2.62     | 1.01     | —        | -1.46    | —        | -5.27    | —        |
| M18         | 1.31     | 16.8     | 4.09     | -1.83    | —        | 4.66     | 9.17     | —        | 4.51     | 5.38     | -0.46    | —        | 3.25     | —        | -        | -4.68    | 3.27     | -20.39   | 3.43     | —        | -5.04    | -8.02    |

| Samp<br>les | IM<br>01 | IM<br>02 | IM<br>03 | IM<br>04 | IM<br>05 | IM<br>06 | IM<br>07 | IM<br>08 | IM<br>09 | IM<br>10 | IM<br>11 | IM<br>12 | IM<br>13 | IM<br>14 | IM<br>15 | IM<br>16 | IM<br>17 | IM<br>18 | IM<br>19 | IM<br>20 | IM<br>21 | IM<br>22 |
|-------------|----------|----------|----------|----------|----------|----------|----------|----------|----------|----------|----------|----------|----------|----------|----------|----------|----------|----------|----------|----------|----------|----------|
| M19         | -0.77    | -2.54    | -5.55    | -6.06    | —        | —        | -2.31    | —        | 8.62     | 3.71     | 1.38     | —        | -        | 5.76     | -1.26    | 1.43     | -6.05    | 4.30     | 7.34     | —        | -6.85    | —        |
| M20         | -1.46    | -9.11    | 5.59     | 11.0     | —        | 1.77     | -6.35    | —        | 6.73     | 6.10     | -0.87    | —        | 0.70     | —        | -        | 1.15     | 7.13     | 5.45     | 4.45     | —        | —        | —        |
| M21         | -0.68    | 0.55     | 15.84    | 2.32     | —        | —        | -1.91    | —        | -0.35    | 4.42     | -0.94    | —        | 5.25     | 19.24    | -6.66    | -1.82    | -4.94    | -0.12    | 3.18     | —        | —        | —        |
| M22         | -        | 13.9     | 7.90     | 2.86     | —        | —        | 2.30     | 0.05     | -5.06    | 5.38     | -3.37    | 5.5      | 10.4     | -0.41    | -1.17    | -        | -0.23    | -2.10    | 5.07     | —        | 6.77     | 0.38     |
| M23         | 0.63     | -        | 8.63     | 9.56     | —        | —        | -5.61    | -2.24    | -9.15    | 4.04     | -4.27    | —        | 3.33     | 20.40    | -7.12    | 1.91     | -1.82    | -14.64   | 6.00     | —        | 5.59     | -        |
| M24         | 5.42     | 0.86     | 9.78     | 6.90     | 10.7     | —        | -1.12    | 3.73     | -6.78    | 3.69     | -1.84    | —        | 0.10     | —        | -3.17    | 5.65     | 17.9     | 17.06    | 14.28    | —        | 11.92    | —        |
| M25         | -0.43    | -5.49    | -5.06    | 7.36     | —        | —        | -4.64    | —        | -9.47    | 2.35     | -5.85    | —        | 1.65     | 7.98     | -9.03    | -        | 23.8     | 7.25     | -0.93    | —        | 5.02     | —        |
| M26         | 0.51     | -1.00    | -1.95    | -0.13    | —        | 19.2     | 3.44     | —        | 0.04     | 6.03     | 10.44    | —        | -        | 0.77     | -9.33    | -        | 4.64     | 23.34    | -2.76    | —        | 6.08     | —        |
| M27         | 0.84     | —        | —        | —        | 5.61     | -0.41    | —        | 2.61     | -0.51    | 4.05     | -0.41    | —        | —        | —        | -2.91    | —        | —        | 4.15     | 8.17     | 6.14     | -4.37    | 8.63     |
| M28         | 7.13     | 2.65     | 5.01     | 13.3     | -7.16    | 20.4     | —        | 6.37     | -2.19    | 4.62     | -6.84    | —        | —        | 2.98     | -3.09    | -0.77    | —        | -1.23    | -1.27    | 0.70     | 6.77     | 9.78     |
| M29         | 6.55     | —        | 12.31    | —        | -8.18    | —        | —        | 10.7     | 9.23     | 7.23     | —        | 3.6      | —        | 3.74     | -4.48    | -2.37    | —        | 7.93     | —        | —        | —        | —        |
| M30         | 0.41     | —        | -1.19    | —        | -5.47    | —        | —        | 13.7     | 0.77     | —        | —        | —        | 9.16     | 3.80     | -3.90    | -1.24    | —        | 0.20     | —        | —        | —        | 10.2     |
| M31         | 2.98     | —        | 4.13     | —        | -1.90    | —        | —        | -2.12    | 10.5     | —        | —        | —        | —        | 2.73     | -3.98    | —        | —        | 5.11     | -2.24    | —        | —        | 19.2     |
| M32         | 0.31     | —        | -0.48    | 4.15     | 0.30     | —        | —        | 3.98     | 18.0     | 5.79     | —        | —        | 10.2     | -1.01    | -0.64    | —        | —        | —        | —        | —        | —        | -0.41    |
| M33         | -2.40    | —        | 12.63    | -6.62    | 3.84     | —        | —        | —        | —        | 4.57     | —        | —        | —        | -3.14    | —        | —        | —        | —        | —        | 7.88     | —        | —        |
| M34         | 2.06     | 7.13     | 13.85    | -1.19    | —        | 8.95     | -1.26    | —        | 21.9     | -1.51    | —        | —        | 2.11     | -0.33    | -3.92    | —        | —        | —        | -2.76    | —        | —        | —        |
| M35         | 3.48     | —        | -2.93    | -0.30    | —        | 7.48     | -3.66    | 16.8     | 20.2     | 3.65     | 10.76    | —        | —        | 1.22     | -0.99    | —        | —        | 8.95     | 8.17     | 13.3     | 3.50     | —        |
| M36         | -5.25    | 3.50     | -3.53    | 2.93     | -2.24    | —        | -4.98    | 2.61     | -1.89    | 2.99     | —        | —        | —        | -0.66    | 8.24     | 7.98     | —        | 7.48     | -1.27    | —        | 4.14     | —        |
| M37         | -4.13    | 4.14     | -7.49    | -1.00    | —        | —        | 2.82     | 6.37     | -0.34    | 2.72     | —        | -        | -        | -        | 11.78    | 0.77     | —        | —        | 10.76    | —        | —        | —        |
| M38         | -3.93    | —        | -6.56    | -2.61    | —        | 3.65     | -2.24    | 10.7     | -1.37    | -31.56   | 4.15     | —        | —        | 1.78     | 0.60     | —        | —        | 7.97     | 13.74    | 0.38     | -6.86    | —        |
| M39         | 3.19     | —        | -5.77    | —        | —        | 2.99     | 14.93    | 13.7     | -0.77    | 5.79     | -6.62    | —        | —        | -        | -2.42    | 4.15     | —        | 4.50     | 9.42     | -        | -        | —        |
| M40         | -7.82    | 3.60     | -3.96    | 6.16     | 11.0     | 2.72     | 8.73     | -2.12    | -2.37    | —        | -1.19    | —        | 6.37     | 11.52    | 1.61     | 7.63     | -2.24    | —        | 16.11    | —        | 7.56     | 5.94     |
| M41         | -6.67    | —        | -8.00    | -9.07    | —        | -        | —        | 3.98     | -1.24    | 3.81     | -0.30    | —        | —        | —        | 1.31     | —        | —        | 0.05     | -6.12    | —        | 4.08     | 9.23     |
| M42         | -4.95    | —        | -3.78    | 4.15     | —        | 3.81     | —        | 12.8     | -1.64    | 2.17     | 2.93     | —        | 11.0     | -9.68    | -0.42    | —        | —        | -2.24    | 2.44     | —        | 3.60     | -5.00    |
| M43         | 9.17     | 7.97     | -4.92    | -6.62    | —        | 2.17     | —        | —        | -3.59    | -1.13    | —        | -        | —        | -        | 2.05     | 6.14     | —        | 3.73     | 13.21    | 8.95     | 13.02    | —        |
| M44         | -3.09    | 4.50     | -6.76    | -1.19    | —        | -1.13    | 5.59     | 3.50     | —        | —        | 7.97     | —        | 12.3     | -        | 6.90     | 0.70     | -6.62    | —        | -2.76    | 7.48     | —        | —        |
| M45         | -2.53    | —        | -3.07    | —        | —        | —        | —        | 4.14     | 1.97     | -7.52    | 4.50     | —        | —        | -1.24    | -3.42    | —        | —        | —        | —        | -7.52    | 13.02    | —        |
| M46         | 2.85     | 0.38     | -3.09    | —        | —        | 6.37     | —        | —        | 4.13     | -16.40   | —        | —        | —        | —        | 3.30     | 6.37     | —        | 23.34    | -2.76    | -        | -        | —        |
| M47         | -1.22    | -        | -4.19    | -        | —        | —        | —        | 8.92     | -1.90    | —        | —        | —        | —        | -7.85    | 2.66     | —        | —        | 4.15     | 8.17     | —        | -0.61    | —        |
| M48         | 1.69     | —        | -        | 11.5     | 4.15     | —        | —        | 4.94     | -1.43    | 7.98     | —        | —        | —        | -4.38    | 4.16     | —        | —        | -1.23    | -1.27    | —        | 5.33     | —        |
| M49         | 2.08     | 4.15     | -6.57    | -9.68    | —        | 4.52     | 0.05     | 1.65     | 2.02     | 0.77     | 7.36     | —        | 6.33     | 0.06     | 4.15     | 7.59     | —        | 7.93     | -3.14    | —        | 8.83     | —        |
| M50         | -6.54    | —        | -4.23    | -        | -0.77    | —        | -2.24    | 11.4     | -0.81    | —        | —        | —        | —        | -7.22    | 2.58     | —        | —        | 0.20     | -        | —        | 7.66     | —        |
| M51         | -3.47    | —        | -9.34    | -        | 9.15     | —        | 3.73     | 9.69     | -2.81    | —        | —        | —        | 0.38     | -1.76    | 4.08     | —        | —        | 5.11     | 9.42     | —        | 7.63     | —        |
| M52         | -1.08    | 13.3     | -8.07    | -1.24    | -        | —        | 10.76    | 2.86     | -2.39    | 3.60     | -6.62    | —        | -        | 0.10     | 3.88     | 7.13     | —        | 8.99     | 16.11    | —        | 5.59     | —        |
| M53         | -3.32    | —        | -6.43    | 18.0     | 4.57     | —        | —        | 9.88     | -1.42    | —        | —        | —        | —        | -4.11    | 5.06     | —        | —        | -9.70    | -6.12    | —        | —        | —        |
| M54         | -0.34    | 2.61     | -        | -7.85    | -        | —        | —        | -1.90    | 2.06     | —        | —        | —        | —        | -1.97    | 3.85     | —        | —        | 7.60     | —        | —        | 8.55     | —        |
| M55         | -5.91    | 6.37     | -        | -4.38    | -1.25    | —        | —        | 0.22     | -3.68    | —        | 3.50     | 7.1      | —        | —        | 3.87     | 5.24     | —        | 3.39     | 13.21    | —        | 6.91     | 3.60     |
| M56         | 1.18     | 10.7     | -        | 0.06     | —        | -1.90    | -0.81    | -1.92    | -0.43    | 1.67     | 4.14     | —        | 11.0     | 1.12     | 5.43     | -2.48    | 4.23     | 23.34    | -2.76    | —        | 1.60     | —        |
| M57         | -1.66    | 13.7     | -1.35    | -7.22    | —        | 0.22     | -2.81    | -3.49    | -0.38    | 4.44     | —        | —        | —        | -0.82    | 2.16     | -7.94    | —        | 4.15     | 8.17     | —        | 3.10     | —        |
| M58         | -3.89    | -2.12    | 6.90     | -1.76    | —        | -1.92    | -2.39    | -2.96    | 2.58     | 0.43     | —        | —        | —        | 0.86     | 3.50     | -6.43    | —        | -1.23    | -1.27    | 5.61     | 1.62     | —        |



| Samp<br>les | IM<br>01 | IM<br>02 | IM<br>03 | IM<br>04 | IM<br>05 | IM<br>06 | IM<br>07 | IM<br>08 | IM<br>09 | IM<br>10 | IM<br>11 | IM<br>12 | IM<br>13 | IM<br>14 | IM<br>15 | IM<br>16 | IM<br>17 | IM<br>18 | IM<br>19 | IM<br>20 | IM<br>21 | IM<br>22 |
|-------------|----------|----------|----------|----------|----------|----------|----------|----------|----------|----------|----------|----------|----------|----------|----------|----------|----------|----------|----------|----------|----------|----------|
| M59         | 1.07     | 3.98     | -7.82    | 0.10     | —        | -1.02    | —        | -2.28    | 10.3     | -3.24    | —        | —        | —        | 1.54     | 3.30     | -1.52    | —        | 7.93     | -1.02    | -        | 5.67     | -        |
| M60         | 5.54     | 8.92     | -2.65    | -4.11    | —        | 2.75     | 4.70     | 14.5     | -0.34    | 2.01     | —        | —        | —        | -4.66    | 2.08     | -3.19    | —        | 0.20     | —        | -        | -        | -8.81    |
| M61         | 0.30     | 4.94     | 11.18    | -1.97    | —        | -3.74    | 3.29     | -0.58    | -1.75    | -1.13    | —        | —        | —        | —        | -3.15    | -2.75    | —        | 5.11     | 2.13     | 1.91     | -        | 3.03     |
| M62         | -0.89    | 1.65     | -6.37    | -2.05    | —        | 10.1     | 2.72     | 4.60     | 13.8     | 13.66    | 9.26     | —        | 4.62     | 11.03    | -5.50    | -1.60    | 2.36     | —        | —        | —        | -        | —        |
| M63         | -0.08    | —        | -0.02    | 1.12     | 7.81     | 7.50     | 16.20    | 0.50     | —        | 14.61    | —        | —        | 8.46     | 4.88     | 3.62     | —        | 22.1     | 7.98     | -1.10    | -2.12    | 1.91     | -5.79    |
| M64         | 0.40     | —        | -7.80    | -0.82    | —        | 8.44     | 7.00     | —        | -5.40    | 2.80     | 7.98     | —        | 23.7     | -7.94    | -        | 2.09     | —        | 0.77     | -3.22    | 10.74    | 2.00     | —        |
| M65         | 0.42     | —        | 1.18     | 0.86     | —        | 3.51     | —        | -        | -0.91    | -6.40    | 0.77     | —        | —        | -8.31    | -        | —        | —        | 23.00    | -        | -3.71    | -2.12    | —        |
| M66         | -0.88    | -0.71    | 10.22    | -        | —        | 4.51     | -2.83    | -2.15    | 20.8     | —        | 23.00    | —        | 11.0     | 0.04     | 0.38     | 2.71     | -6.04    | —        | 4.08     | —        | —        | —        |
| M67         | 13.30    | —        | 19.24    | —        | 11.0     | —        | —        | 9.33     | -0.33    | —        | —        | —        | —        | -1.00    | -        | —        | —        | —        | —        | —        | —        | —        |
| M68         | -1.97    | 67.4     | -0.41    | -0.71    | —        | 4.33     | -1.81    | —        | -1.57    | -0.33    | 5.53     | -        | 5.69     | —        | -7.42    | 0.38     | 6.64     | -1.19    | 4.59     | —        | —        | —        |
| M69         | -1.30    | 9.85     | 20.40    | —        | -7.76    | -2.08    | 5.96     | -        | -0.04    | —        | —        | 2.4      | —        | -0.09    | -1.10    | —        | —        | -3.36    | 7.72     | —        | —        | —        |
| M70         | -7.81    | —        | —        | —        | 0.19     | —        | —        | -7.52    | -0.06    | 3.08     | 7.98     | —        | —        | -0.61    | -3.22    | 17.7     | —        | —        | —        | —        | —        | —        |
| M71         | -1.44    | 2.44     | 4.87     | 7.81     | —        | -5.90    | 5.66     | -        | 4.05     | 3.24     | 0.77     | —        | —        | -6.21    | -        | 2.90     | —        | 23.32    | 7.72     | -6.31    | 22.67    | —        |
| M72         | 3.06     | —        | -5.28    | —        | -7.24    | —        | —        | 0.30     | 0.05     | 5.59     | —        | —        | —        | 10.52    | 4.08     | —        | —        | 12.03    | —        | —        | 5.62     | -        |
| M73         | 11.24    | —        | 6.14     | —        | 1.71     | —        | —        | -8.59    | -2.24    | -15.67   | —        | —        | —        | -0.70    | -6.74    | —        | —        | 8.15     | —        | —        | —        | —        |
| M74         | -8.38    | 1.47     | 0.70     | 1.61     | —        | 7.98     | 4.38     | —        | 3.73     | 5.44     | -1.19    | —        | 1.88     | —        | 7.51     | -8.79    | 10.7     | —        | 3.24     | —        | —        | —        |
| M75         | -7.46    | 12.0     | 2.65     | -3.62    | —        | 0.77     | 5.59     | -0.34    | -2.04    | 5.25     | -3.36    | —        | -        | -7.73    | 4.86     | -0.35    | 10.9     | —        | -        | —        | —        | -        |
| M76         | -0.78    | 8.25     | 3.49     | —        | —        | 23.0     | —        | 2.32     | 3.50     | 1.86     | 4.37     | —        | —        | -9.94    | 2.65     | -4.45    | —        | —        | 7.24     | 5.40     | -7.80    | -        |
| M77         | 3.61     | —        | 5.54     | —        | —        | —        | 2.17     | —        | 2.48     | 8.02     | 9.75     | 7.8      | —        | -4.26    | -        | —        | —        | -4.25    | —        | —        | —        | -9.59    |
| M78         | -8.09    | 9.85     | -        | -4.25    | —        | 9.04     | 2.33     | 5.07     | 1.84     | 7.93     | 6.58     | —        | —        | —        | -7.52    | 1.28     | —        | 7.32     | 12.55    | -        | -        | —        |
| M79         | -0.91    | 20.8     | 3.73     | -5.25    | —        | -        | -4.07    | 6.12     | -3.64    | 8.92     | 11.78    | —        | -        | —        | -        | 0.22     | —        | -7.58    | 7.68     | -8.60    | 11.03    | —        |
| M80         | 11.04    | 14.4     | 11.50    | -7.58    | 6.12     | —        | -1.95    | 20.0     | -0.65    | 0.37     | 11.74    | —        | -        | -2.69    | 0.30     | -2.80    | —        | —        | 7.97     | —        | —        | —        |
| M81         | -0.70    | 12.0     | 12.90    | 14.2     | —        | -8.77    | 7.51     | 19.5     | 2.46     | 1.51     | 5.03     | —        | —        | -5.90    | -8.59    | —        | —        | 14.24    | 4.50     | -        | 9.59     | 16.9     |
| M82         | 21.65    | 4.25     | -        | 19.8     | —        | -9.06    | —        | 4.37     | 65.1     | 6.29     | 10.57    | —        | —        | —        | -6.00    | —        | —        | 19.86    | 22.29    | 1.89     | —        | 13.5     |
| M83         | -0.28    | —        | 7.33     | 3.50     | —        | —        | 4.99     | —        | 5.20     | -0.06    | 9.91     | —        | -        | —        | 12.27    | —        | —        | 21.50    | 9.03     | —        | 4.14     | —        |
| M84         | -0.75    | -5.90    | 5.71     | 4.14     | 2.44     | —        | -3.91    | —        | 16.9     | 4.77     | 19.09    | —        | 6.21     | —        | 1.38     | -        | —        | 4.14     | —        | —        | 1.41     | -        |
| M85         | -0.34    | —        | 4.37     | 3.41     | —        | —        | 4.59     | -6.01    | 13.5     | -3.66    | 24.50    | —        | 6.43     | —        | -        | -5.48    | —        | 3.41     | —        | —        | 1.97     | —        |
| M86         | -0.17    | 5.66     | -6.01    | 5.97     | —        | —        | 3.65     | -2.05    | 4.12     | 8.95     | -4.24    | —        | —        | —        | -        | -4.04    | —        | 7.97     | -8.67    | —        | —        | 5.66     |
| M87         | -7.54    | —        | -2.05    | 12.7     | —        | -        | —        | 0.33     | -1.22    | 7.48     | 9.68     | —        | —        | —        | -7.78    | —        | —        | 16.76    | —        | -        | —        | —        |
| M88         | 5.52     | —        | 0.33     | 12.0     | —        | 7.81     | -        | -1.02    | 4.47     | 3.51     | 8.51     | —        | 10.7     | —        | -9.66    | —        | —        | 18.05    | 3.68     | —        | -7.13    | 6.24     |
| M89         | -3.02    | —        | -6.34    | 10.3     | —        | —        | -7.52    | 3.24     | 4.41     | 3.42     | 5.37     | —        | 10.9     | 1.77     | -7.54    | -0.06    | -        | 10.39    | 8.51     | —        | —        | —        |
| M90         | -1.30    | —        | -5.06    | 7.96     | —        | -1.10    | -        | -2.43    | -2.21    | 10.24    | 9.75     | —        | —        | —        | -        | 1.21     | —        | 7.96     | 2.37     | —        | -8.12    | 8.14     |
| M91         | -8.44    | 7.32     | 19.58    | 8.58     | —        | -3.22    | 0.30     | 3.54     | 3.98     | 1.55     | -0.73    | —        | —        | -0.71    | -8.84    | —        | —        | —        | 5.75     | 7.94     | —        | —        |
| M92         | 3.65     | 25.4     | 6.52     | 5.94     | —        | -        | -8.59    | —        | -3.69    | 8.84     | 0.36     | —        | 3.67     | —        | 2.57     | —        | —        | 7.72     | -0.73    | —        | —        | -8.84    |
| M93         | -6.73    | -4.71    | 21.63    | 7.96     | 0.07     | 4.08     | -        | 1.37     | -7.26    | -13.77   | -        | 5.6      | 5.62     | -        | —        | —        | —        | —        | 0.36     | 12.17    | 0.15     | -        |
| M94         | -7.43    | 6.12     | 7.75     | —        | -1.52    | -1.10    | -7.52    | 6.24     | -0.28    | 2.52     | —        | —        | —        | -        | —        | —        | —        | 9.72     | -1.59    | 17.54    | —        | -1.77    |
| M95         | -5.13    | 20.1     | 68.47    | —        | 9.44     | —        | 5.66     | 19.3     | -4.09    | -14.94   | —        | —        | —        | 7.04     | -8.84    | 1.35     | —        | —        | 10.02    | 5.41     | —        | -0.75    |
| M96         | -7.45    | —        | 9.42     | —        | -        | —        | —        | -        | -3.72    | -4.84    | —        | —        | —        | -        | 7.57     | 23.1     | —        | —        | 23.90    | 20.51    | 2.38     | —        |

| Samp<br>les | IM<br>01 | IM<br>02 | IM<br>03 | IM<br>04 | IM<br>05 | IM<br>06 | IM<br>07 | IM<br>08 | IM<br>09 | IM<br>10 | IM<br>11 | IM<br>12 | IM<br>13 | IM<br>14 | IM<br>15 | IM<br>16 | IM<br>17 | IM<br>18 | IM<br>19 | IM<br>20 | IM<br>21 | IM<br>22 |
|-------------|----------|----------|----------|----------|----------|----------|----------|----------|----------|----------|----------|----------|----------|----------|----------|----------|----------|----------|----------|----------|----------|----------|
| M97         | -7.77    | —        | 2-       | —        | 8.63     | —        | —        | -8.59    | -6.10    | -24.73   | —        | —        | -        | -        | —        | 13.2     | —        | —        | 21.02    | 17.43    | —        | 7.08     |
| M98         | -6.40    | 12.1     | 23.12    | —        | 9.61     | —        | —        | -        | -0.72    | -13.72   | —        | —        | —        | 14.30    | 7.90     | 4.31     | —        | —        | —        | 8.90     | —        | 2.58     |
| M99         | -        | —        | 12.25    | —        | 6.10     | —        | —        | -        | -2.90    | 14.40    | —        | —        | 9.10     | -        | 4.21     | 7.45     | —        | —        | 6.50     | 10.02    | -8.68    | 6.44     |
| M100        | -6.50    | —        | 2.76     | —        | -        | —        | 12.09    | -        | -3.57    | -12.87   | —        | —        | -        | 3.25     | 5.50     | 3.22     | —        | —        | 3.43     | 3.29     | —        | —        |
| M101        | -5.98    | 9.50     | -1.02    | —        | 22.9     | -6.70    | 12.65    | -        | 20.1     | -17.67   | —        | —        | 4.45     | 13.29    | 6.43     | -4.04    | —        | —        | 9.69     | -        | —        | 8.41     |
| M102        | -6.35    | 2.29     | 4.04     | —        | -5.44    | —        | —        | -0.93    | -4.01    | -18.65   | —        | —        | —        | -9.78    | 9.69     | -        | —        | —        | 6.50     | 20.73    | 9.10     | 3.80     |
| M103        | -4.41    | 9.03     | 5.86     | —        | 9.47     | 1.17     | 12.13    | -        | -3.06    | -20.61   | —        | —        | —        | -        | 6.50     | —        | —        | 5.86     | 9.37     | 14.19    | -4.90    | 8.28     |
| M104        | -5.69    | 10.7     | 8.39     | —        | 20.0     | 16.3     | —        | -        | -3.63    | 22.57    | —        | —        | —        | 1.26     | 9.37     | —        | —        | 8.39     | -1.02    | 13.29    | 2.45     | —        |
| M105        | -5.03    | 7.24     | 8.57     | —        | —        | —        | —        | -        | -2.13    | 8.97     | —        | —        | —        | -3.67    | -        | -9.44    | 814.     | —        | —        | 16.59    | 4.06     | —        |
| M106        | -4.21    | —        | 13.09    | —        | -        | —        | —        | -        | -3.61    | 11.60    | 1.90     | —        | -        | -3.56    | 8.90     | -        | —        | —        | 8.55     | 3.54     | —        | 3.86     |
| M107        | -3.98    | —        | -        | —        | -        | —        | —        | -        | -2.24    | -16.03   | —        | —        | -        | 14.61    | —        | —        | —        | —        | 15.87    | -7.75    | —        | 8.39     |
| M108        | -3.80    | —        | -7.22    | —        | 17.8     | 8.85     | 7.33     | -        | -4.81    | -22.42   | —        | —        | —        | -        | —        | -1.02    | —        | —        | 6.58     | 10.21    | —        | —        |
| M109        | -2.92    | 8.81     | -        | —        | -8.75    | 3.93     | 5.90     | -        | -2.50    | -17.03   | —        | —        | —        | -        | 14.56    | -6.21    | —        | —        | 6.34     | 22.62    | —        | —        |
| M110        | -3.44    | —        | -        | —        | 11.7     | —        | —        | -        | -7.79    | 14.48    | —        | -        | 12.3     | -        | —        | 14.7     | —        | —        | —        | 20.75    | -        | 17.7     |
| M111        | -2.75    | —        | 14.23    | —        | 5.50     | —        | —        | -        | -3.68    | -18.10   | —        | —        | —        | -4.00    | -3.62    | —        | —        | 15.17    | 8.17     | 13.84    | -9.07    | 6.86     |
| M112        | -1.88    | 8.18     | 6.09     | —        | -        | —        | —        | -        | -        | -18.06   | —        | —        | 3.18     | 6.87     | 11.43    | 12.9     | —        | 16.35    | 16.35    | 8.80     | —        | 4.04     |
| M113        | -1.55    | —        | -9.28    | —        | 23.5     | —        | 7.18     | -9.07    | -2.79    | -21.49   | —        | —        | —        | 18.46    | 7.94     | 20.3     | —        | —        | 6.05     | -3.64    | 12.33    | 13.1     |
| M114        | -1.06    | —        | 13.61    | —        | -        | —        | —        | -8.11    | -4.02    | -19.08   | —        | —        | 12.0     | 4.13     | 3.88     | 7.22     | —        | —        | 18.50    | 4.02     | —        | -1.01    |
| M115        | 0.55     | -8.68    | -        | —        | 9.82     | —        | -9.09    | -        | -        | -21.89   | —        | —        | 4.06     | 5.01     | —        | 7.36     | —        | —        | -4.04    | 6.26     | 17.48    | -        |
| M116        | -0.95    | -        | 19.33    | —        | -2.56    | —        | —        | -        | -7.55    | -22.07   | —        | —        | —        | -1.02    | —        | 10.1     | —        | —        | 22.30    | -        | 7.70     | 6.93     |
| M117        | -0.51    | -        | 13.93    | —        | -        | —        | —        | -        | -6.48    | -15.12   | —        | —        | —        | -3.25    | 1.30     | —        | —        | 4.26     | 8.87     | 5.78     | 21.75    | —        |
| M118        | 1.27     | —        | 15.68    | —        | 1.11     | 1.98     | —        | -        | 18.9     | -20.60   | —        | —        | 6.22     | 4.57     | 7.73     | 5.90     | —        | —        | 4.10     | 8.83     | 17.48    | 9.77     |
| M119        | -0.28    | -9.09    | -        | —        | -        | —        | —        | -        | -        | 19.86    | —        | —        | —        | 3.10     | -3.00    | —        | —        | 8.18     | -4.90    | 9.77     | —        | 11.6     |
| M120        | -0.48    | —        | -        | —        | -        | —        | —        | 0.83     | -7.25    | 6.69     | —        | —        | —        | 8.27     | 1.51     | -        | —        | —        | 4.45     | 6.20     | 6.54     | 3.60     |
| M121        | 0.59     | —        | -4.04    | —        | 11.6     | -6.70    | 1.65     | -        | -3.88    | -8.45    | —        | —        | —        | 4.60     | -        | 4.02     | —        | —        | 14.54    | -3.25    | —        | —        |
| M122        | 0.94     | —        | -3.68    | —        | 18.8     | —        | —        | 9.90     | -7.52    | 13.75    | —        | —        | —        | -7.45    | —        | 5.82     | —        | 12.13    | 7.33     | 9.21     | —        | 5.28     |
| M123        | 1.24     | —        | -6.58    | —        | 7.32     | —        | —        | -        | -4.16    | -20.88   | —        | —        | -        | 6.68     | —        | 6.43     | —        | —        | 5.71     | 15.08    | —        | 18.1     |
| M124        | 1.34     | 7.33     | 2.83     | —        | 20.6     | —        | 4.59     | -        | -2.04    | 2.42     | —        | —        | —        | 3.47     | —        | -1.27    | —        | —        | 6.99     | 13.25    | 7.84     | 6.15     |
| M125        | 1.74     | —        | 22.33    | —        | 8.72     | —        | 6.24     | -        | -6.87    | -16.46   | —        | —        | —        | -2.06    | 20.01    | -7.46    | —        | —        | 3.44     | 5.81     | —        | —        |
| M126        | -0.45    | —        | 10.71    | —        | -        | —        | 5.86     | -        | -6.85    | -19.48   | —        | —        | —        | 7.17     | -5.33    | 5.18     | —        | —        | -1.02    | 3.44     | —        | 6.22     |
| M127        | 0.85     | —        | 3.07     | —        | 7.64     | 2.18     | 8.40     | -        | -7.42    | 4.72     | —        | —        | 15.1     | 6.77     | —        | 5.01     | —        | —        | 5.08     | 9.74     | 7.17     | 4.23     |
| M128        | 1.49     | —        | 16.40    | —        | 8.36     | —        | 12.02    | -        | -        | -5.47    | —        | —        | 14.3     | 9.49     | 3.71     | 15.9     | —        | —        | 12.65    | 5.04     | 0.60     | 6.50     |
| M129        | 2.69     | —        | 19.33    | —        | 22.5     | 5.86     | 18.56    | -        | -9.92    | -21.17   | —        | —        | —        | -        | 3.03     | 3.50     | —        | -9.09    | 12.25    | 16.91    | 11.63    | 12.7     |
| M130        | 1.59     | 5.86     | 13.93    | —        | 8.33     | 5.39     | —        | -        | -6.72    | -13.57   | —        | —        | —        | -0.48    | -0.62    | -7.16    | —        | —        | -9.69    | 14.86    | 14.57    | 9.78     |
| M131        | 1.66     | 8.39     | -4.00    | —        | —        | —        | —        | -        | -        | -4.96    | —        | —        | —        | 1.94     | —        | 4.52     | —        | —        | 4.49     | 8.87     | -7.78    | 2.72     |
| M132        | -2.18    | —        | -5.38    | —        | -0.14    | —        | 12.33    | -        | -7.94    | -10.91   | —        | —        | 5.47     | -7.76    | —        | 10.2     | —        | 7.52     | 1.23     | 5.35     | 7.17     | —        |
| M133        | 6.44     | -        | 12.33    | —        | -5.50    | 12.1     | —        | -        | -7.11    | -10.26   | —        | —        | —        | -        | 14.81    | -1.66    | —        | —        | 6.09     | -        | —        | —        |
| M134        | 1.99     | -9.07    | 8.18     | —        | -        | —        | —        | -        | -8.61    | -11.33   | 5.90     | —        | —        | 10.72    | —        | —        | —        | 22.18    | 1.94     | -4.65    | -6.70    | 12.6     |

| Samp<br>les | IM<br>01 | IM<br>02 | IM<br>03 | IM<br>04 | IM<br>05 | IM<br>06 | IM<br>07 | IM<br>08 | IM<br>09 | IM<br>10 | IM<br>11 | IM<br>12 | IM<br>13 | IM<br>14 | IM<br>15 | IM<br>16 | IM<br>17 | IM<br>18 | IM<br>19 | IM<br>20 | IM<br>21 | IM<br>22 |
|-------------|----------|----------|----------|----------|----------|----------|----------|----------|----------|----------|----------|----------|----------|----------|----------|----------|----------|----------|----------|----------|----------|----------|
| M135        | 1.53     | -9.05    | 3.21     | —        | 17.5     | —        | —        | -        | -9.64    | -16.23   | —        | —        | —        | -3.59    | -        | -9.19    | —        | 7.49     | 12.54    | 4.76     | —        | —        |
| M136        | -0.09    | 1.03     | -9.05    | —        | -9.39    | —        | —        | -        | 1.08     | -22.53   | —        | —        | —        | -4.04    | -5.06    | -6.06    | —        | 11.23    | 6.77     | —        | —        | —        |
| M137        | -1.60    | —        | 1.03     | —        | -        | —        | —        | -        | -4.89    | -16.49   | —        | —        | —        | -        | 1.67     | -        | —        | 6.09     | 7.59     | —        | —        | —        |
| M138        | -6.57    | —        | -7.17    | —        | -        | —        | —        | -        | -7.71    | 2.69     | —        | —        | 4.71     | -        | —        | -6.19    | —        | —        | 7.72     | 2.80     | 4.11     | 16.2     |
| M139        | 4.16     | —        | -9.26    | —        | -9.88    | -        | —        | -        | -5.98    | -11.94   | —        | —        | —        | -        | -5.74    | -3.07    | —        | 7.72     | 5.58     | 6.04     | —        | —        |
| M140        | 1.90     | —        | -        | 3.17     | -5.23    | —        | -9.00    | -        | -        | -4.42    | —        | —        | 0.83     | -        | 7.16     | -4.52    | —        | 8.58     | 4.03     | —        | —        | 15.6     |
| M141        | 2.68     | 3.67     | -        | —        | -        | -        | —        | -        | -        | -4.03    | —        | —        | —        | 1.88     | —        | -6.30    | —        | —        | 9.17     | 1.85     | —        | —        |
| M142        | 1.60     | —        | 0.86     | —        | -5.85    | —        | 2.47     | -        | -3.37    | -3.54    | —        | —        | —        | -8.31    | 8.80     | 12.2     | —        | —        | 6.35     | 4.23     | —        | 20.5     |
| M143        | -1.10    | —        | 3.15     | —        | -        | —        | —        | —        | -5.85    | -12.29   | —        | —        | —        | -        | —        | 12.1     | —        | 4.03     | 6.05     | 1.72     | 10.07    | 2.88     |
| M144        | 2.63     | —        | -4.55    | —        | -        | —        | 4.43     | -        | -4.94    | -17.62   | —        | —        | —        | -6.75    | 4.25     | 5.51     | —        | —        | 11.50    | —        | -1.36    | 8.27     |
| M145        | -4.81    | —        | -        | —        | -        | 2.67     | 5.95     | -        | 0.26     | -12.08   | —        | 2.4      | —        | -        | 16.51    | 23.5     | —        | —        | -        | 5.81     | -9.72    | -0.18    |
| M146        | 1.82     | —        | -6.07    | —        | -5.66    | —        | 2.47     | -        | -        | -3.96    | —        | —        | -        | 7.78     | —        | -9.61    | —        | 9.33     | -2.30    | 11.68    | 0.07     | —        |
| M147        | 6.74     | —        | -0.93    | —        | -        | -3.93    | -0.02    | -        | -6.64    | -3.94    | -9.00    | —        | —        | 6.58     | 17.82    | -2.75    | —        | —        | -4.87    | 7.18     | —        | —        |
| M148        | -0.38    | —        | -2.98    | —        | -7.55    | —        | —        | -        | 11.8     | -6.46    | —        | —        | —        | 7.83     | 4.67     | -9.24    | —        | 13.93    | -2.10    | —        | 8.14     | 2.43     |
| M149        | 7.21     | —        | -7.61    | —        | 7.31     | —        | —        | -        | 0.32     | -23.16   | —        | —        | —        | -        | 10.02    | -3.50    | —        | —        | -4.90    | 4.60     | —        | 5.34     |
| M150        | 5.31     | —        | 2.31     | —        | -3.21    | —        | —        | -        | -7.74    | -12.13   | —        | —        | 6.38     | -        | —        | -6.34    | —        | 15.68    | 2.45     | 5.95     | 9.87     | 10.6     |
| M151        | 8.24     | —        | -        | —        | 15.4     | —        | —        | -        | 3.74     | -21.91   | —        | —        | —        | -        | 9.10     | -7.27    | —        | —        | 4.54     | 8.38     | -4.44    | -4.81    |
| M152        | -4.37    | —        | -6.06    | —        | -        | —        | —        | -        | -        | 17.71    | —        | —        | —        | 2.44     | —        | -1.73    | —        | 5.71     | —        | 7.60     | -7.00    | -7.87    |
| M153        | 2.99     | —        | -        | —        | -7.11    | 6.22     | —        | -        | -        | -22.34   | —        | —        | —        | -9.09    | -3.60    | -2.71    | —        | —        | 3.93     | 5.95     | 1.28     | —        |
| M154        | 5.42     | 2.47     | 19.86    | —        | -8.89    | —        | -1.10    | -        | -        | -8.68    | —        | —        | —        | -        | -        | 5.93     | —        | 8.38     | 5.03     | —        | -5.89    | 5.91     |
| M155        | 5.91     | —        | 20.50    | —        | -3.05    | —        | 2.33     | -7.61    | -        | -19.90   | —        | —        | 24.9     | -        | -6.06    | -0.69    | —        | 12.47    | 9.89     | —        | 0.41     | 6.41     |
| M156        | 6.35     | —        | 14.14    | —        | -        | —        | 5.71     | -        | -        | —        | —        | —        | —        | -        | -4.06    | 0.84     | —        | 2.59     | 19.73    | 12.47    | —        | 4.08     |
| M157        | 5.15     | —        | 1.41     | —        | -        | -        | —        | -        | -9.00    | -23.04   | —        | —        | —        | -3.55    | —        | -1.26    | —        | —        | 15.72    | 7.59     | —        | 1.39     |
| M158        | 2.88     | —        | 5.97     | —        | -9.79    | —        | —        | -        | -2.06    | -0.52    | —        | —        | —        | -        | 9.10     | -1.00    | —        | 4.43     | —        | 9.79     | —        | —        |
| M159        | 4.33     | —        | 12.76    | 1.69     | 3.21     | -8.88    | —        | -        | -        | -22.34   | —        | —        | 0.23     | -1.73    | 3.36     | -3.22    | —        | 15.95    | 13.93    | 14.10    | 1.67     | —        |
| M160        | 6.56     | -3.28    | 10.05    | —        | -8.94    | -        | —        | -        | -        | -25.10   | —        | —        | 1.24     | -2.71    | -9.50    | -2.21    | —        | 9.47     | 5.68     | 10.47    | 2.19     | 5.91     |
| M161        | 5.63     | 1.71     | 12.39    | —        | -6.62    | -2.18    | —        | -        | -7.48    | -25.13   | —        | 1.9      | —        | -        | -        | 3.94     | —        | —        | 13.72    | -4.88    | 6.22     | —        |
| M162        | 5.94     | -5.19    | 7.96     | —        | -        | —        | 11.37    | -        | -        | -21.56   | —        | —        | 4.21     | -6.19    | -        | 6.65     | —        | 11.88    | 9.33     | 3.54     | 6.67     | —        |
| M163        | 5.26     | -0.92    | 15.58    | —        | -        | —        | —        | -        | -        | -23.70   | —        | —        | -        | -        | -        | 3.12     | —        | —        | 2.33     | 3.00     | 5.19     | —        |
| M164        | 6.16     | 3.21     | 5.94     | —        | -8.63    | —        | 6.27     | -        | -8.15    | 19.03    | —        | -        | —        | 14.15    | 3.73     | 7.45     | —        | —        | 5.71     | 1.35     | 3.67     | 1.71     |
| M165        | 7.87     | 5.76     | 7.96     | -9.83    | -8.68    | —        | —        | -        | -        | -26.28   | —        | —        | —        | -7.02    | 8.66     | 12.4     | —        | —        | -3.00    | -3.00    | 6.67     | —        |
| M166        | 6.19     | -6.91    | 5.63     | —        | -9.83    | —        | 4.60     | -        | -        | -24.15   | —        | —        | —        | -        | -3.59    | 15.0     | —        | 5.90     | 6.52     | 6.52     | —        | 2.75     |
| M167        | 7.50     | -5.08    | 6.06     | —        | -        | 1.56     | —        | -        | -8.27    | -26.26   | —        | —        | —        | -        | -5.15    | 3.05     | —        | —        | 1.88     | 5.87     | -5.19    | —        |
| M168        | 8.05     | -4.25    | 7.92     | —        | -7.24    | 1.90     | —        | -        | -        | -24.41   | —        | —        | —        | -        | —        | -5.05    | —        | 4.81     | 5.93     | 5.26     | -0.92    | —        |
| M169        | 5.98     | -6.18    | -7.61    | —        | -8.02    | -1.00    | -2.07    | -        | -5.40    | -24.25   | —        | —        | 1.04     | -        | 2.69     | -3.74    | —        | —        | 5.68     | 2.67     | 7.76     | -3.33    |

IM: Target; “—”, unpeaked; when the relative error value is 0, it is indicated by “/”.
